# Supplementary material for: Gender difference in the relationship between anemia and vitamin D in Korean adults: the fifth Korea National Health and Nutrition Examination Survey
Source: PubMed Central journal article supplement — J Clin Biochem Nutr. 2021 May 28;69(3):299–304. doi: 10.3164/jcbn.21-26 (PMC8611370; doi:10.3164/jcbn.21-26), 2021-05-28
Supplement: jcbn21-26st01.pdf [file jcbn21-26st01.pdf]

**Supplemental Table 1.** Clinical characteristics according to vitamin D status in overall [Mean  $\pm$  SD, n (%), n = 16,060]

| Variables             | Vitamin D normal<br>(n = 9,997) | Vitamin D deficiency<br>(n = 6,070) | p value |
|-----------------------|---------------------------------|-------------------------------------|---------|
| 25(OH)D (ng/ml)       | 20.87 $\pm$ 4.99                | 11.87 $\pm$ 2.18                    | <0.001  |
| Age (years)           | 52.13 $\pm$ 15.76               | 46.69 $\pm$ 16.21                   | <0.001  |
| Current smoker        | 2,107 (22.8)                    | 862 (14.1)                          | <0.001  |
| Alcohol drinker       | 5,403 (54.0)                    | 2,909 (47.7)                        | <0.001  |
| Regular exerciser     | 959 (9.6)                       | 403 (6.6)                           | <0.001  |
| SBP (mmHg)            | 120.93 $\pm$ 17.26              | 117.98 $\pm$ 17.31                  | <0.001  |
| DBP (mmHg)            | 76.75 $\pm$ 10.48               | 75.53 $\pm$ 10.44                   | <0.001  |
| BUN (mg/dl)           | 14.95 $\pm$ 4.48                | 13.27 $\pm$ 4.03                    | <0.001  |
| Crea (mg/dl)          | 0.85 $\pm$ 0.20                 | 0.79 $\pm$ 0.20                     | <0.001  |
| FBG (mg/dl)           | 98.59 $\pm$ 22.65               | 96.44 $\pm$ 21.35                   | <0.001  |
| Ferritin ( $\mu$ g/L) | 83.98 $\pm$ 66.29               | 66.61 $\pm$ 62.71                   | <0.001  |
| Fe ( $\mu$ g/dl)      | 115.67 $\pm$ 47.50              | 108.18 $\pm$ 46.65                  | <0.001  |
| TIBC ( $\mu$ g/dl)    | 314.35 $\pm$ 43.28              | 319.94 $\pm$ 47.26                  | <0.001  |
| Hb (g/dl)             | 14.12 $\pm$ 1.56                | 13.70 $\pm$ 1.60                    | <0.001  |
| Hct (%)               | 41.93 $\pm$ 4.07                | 40.86 $\pm$ 4.09                    | <0.001  |
| Anemia                | 752 (7.5)                       | 650 (10.7)                          | <0.001  |

Vitamin D normal, 25(OH)D  $\geq$ 15.0 ng/ml; Vitamin D deficiency, 25(OH)D <15.0 ng/ml.
